# Supplementary material for: Thermostable polymeric nanomicelles of iridium(iii) complexes with aggregation-induced phosphorescence emission characteristics and their recyclable double-strand DNA monitoring
Source: Royal Society of Chemistry journal article supplement (doi:10.1039/c6tb02336c), 2016-11-01
Supplement: c6tb02336c1.pdf [file c6tb02336c1.pdf]

## Supporting Information

### Thermostable Polymeric Nanomicelles of Iridium (III) Complexes with Aggregation-induced Phosphorescence Emission Characteristics and Their Recyclable Double-strand DNA Monitoring

Jingwen Ma, Yun Zeng, Yongchun Liu, Daocheng Wu\*

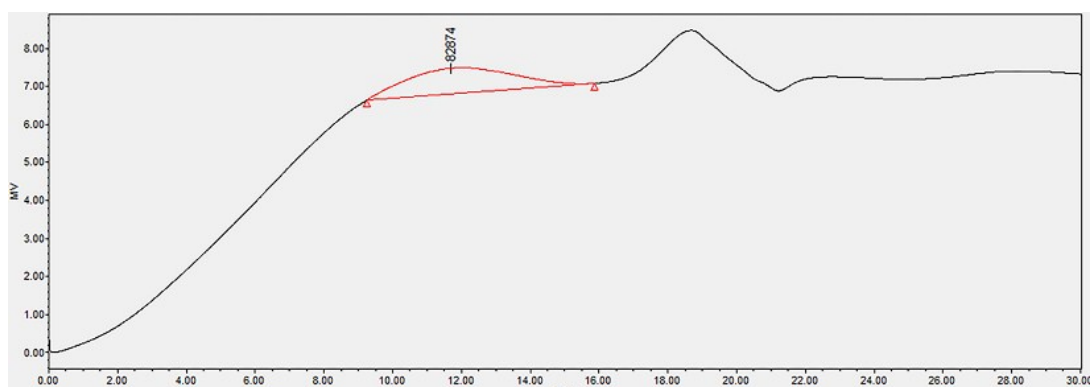

Fig. S1 The GPC result of  $(DIP)_2Ir(ECA)$  polymer

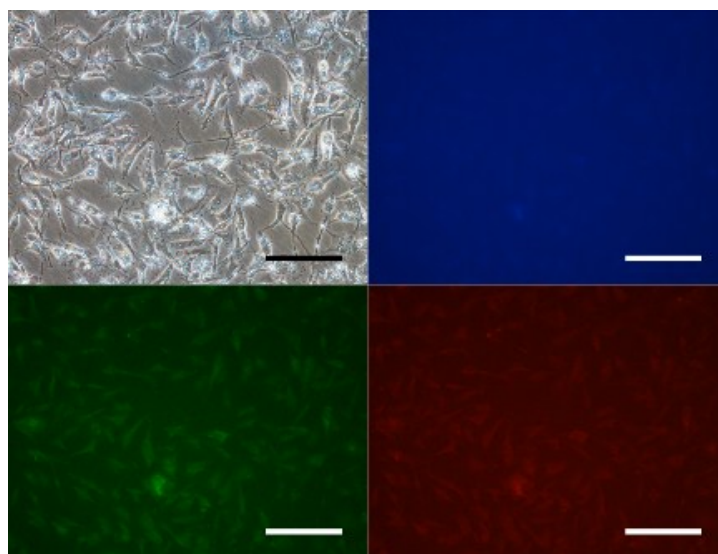

Fig. S2. The AIP-E active imaging in living cells. Scale bar=50 μm.

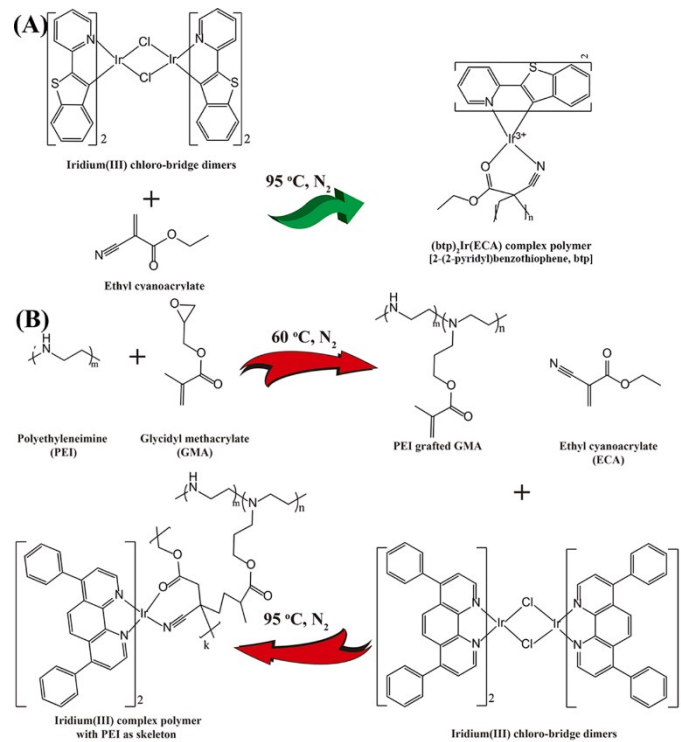

**Fig. S3** The scheme of Ir(III) complex polymer with 2-(2-pyridyl)benzothioephene as ligand (A) and polyethyleneimine as skeleton (B) synthesis

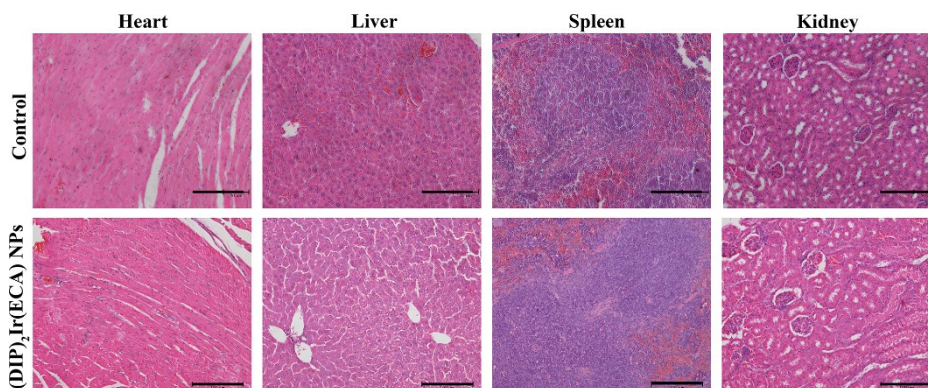

**Fig. S4** The tissue section images of heart, liver, spleen and kidney of BALB/c mice treated by PBS and (DIP)<sub>2</sub>Ir(ECA) nanomicelles. Scale bar was 100  $\mu\text{m}$

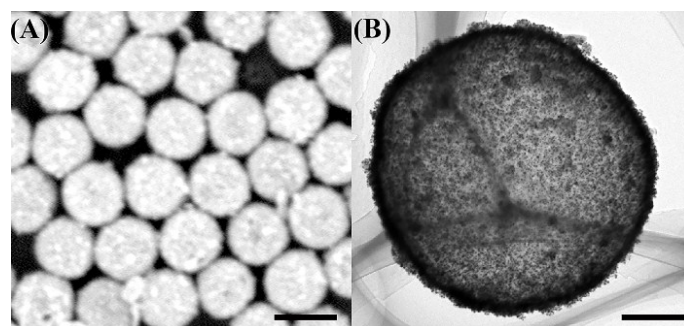

Fig. S5 (A) The SEM image of CS(2.0)-5. Scale bar= 2.0  $\mu$ m. (B) The TEM image of CS(2.0)-5. Scale bar= 400 nm.

Table S1. The phosphorescence intensity and wavelength in H<sub>2</sub>O/acetone mixed solvents.

| Samples                        | 1       | 2       | 3     | 4     | 5     | 6                |
|--------------------------------|---------|---------|-------|-------|-------|------------------|
| acetone/H <sub>2</sub> O ratio | acetone | 3:1     | 1:1   | 1:3   | 1:7   | H <sub>2</sub> O |
| Intensity ( $\times 10^5$ CPS) | 3.20    | 3.25    | 15.04 | 33.92 | 89.15 | 49.58            |
| Wavelength (nm)                | 542+420 | 516+433 | 448   | 446   | 445   | 446              |

Table S2. The phosphorescence wavelength with different H<sub>2</sub>O-diluted times.

| Samples                        | 1       | 2       | 3        | 4        | 5        | 6       | 7       | 8       | 9       | 10      | 11      | 12      | 13      | 14      |
|--------------------------------|---------|---------|----------|----------|----------|---------|---------|---------|---------|---------|---------|---------|---------|---------|
| H <sub>2</sub> O-diluted times | 0       | 1.1     | 1.2<br>5 | 1.4<br>3 | 1.6<br>7 | 2.0     | 2.5     | 3.3     | 5       | 10      | 15      | 20      | 30      | 60      |
| Wavelength (nm)                | 56<br>6 | 56<br>5 | 55<br>4  | 54<br>4  | 52<br>1  | 51<br>6 | 51<br>6 | 50<br>1 | 48<br>4 | 46<br>8 | 46<br>3 | 45<br>7 | 45<br>0 | 44<br>4 |

Table S3. Phosphorescence DNA quenching in concentration-dependent manner.

| Samples                                   | 1                 | 2                 | 3                 | 4                 | 5                 | 6                 | 7                 | 8                 | 9                 | 10                | 11                |
|-------------------------------------------|-------------------|-------------------|-------------------|-------------------|-------------------|-------------------|-------------------|-------------------|-------------------|-------------------|-------------------|
| DNA ( $\mu$ L)                            | 0                 | 5                 | 10                | 15                | 20                | 25                | 30                | 35                | 40                | 45                | 50                |
| Wavelength (nm)                           | 447               | 447               | 447               | 447               | 447               | 447               | 446               | 444               | 444               | 444               | 444               |
| Phosphorescence ( $\times 10^4$ CPS), n=3 | 567               | 551               | 540               | 525               | 513               | 503               | 492               | 479               | 470               | 459               | 451               |
| Ave $\pm$ SD ( $\times 10^4$ CPS)         | 598<br>3 $\pm$ 24 | 574<br>3 $\pm$ 22 | 558<br>0 $\pm$ 22 | 542<br>3 $\pm$ 23 | 528<br>0 $\pm$ 22 | 515<br>0 $\pm$ 21 | 501<br>7 $\pm$ 21 | 489<br>3 $\pm$ 21 | 475<br>0 $\pm$ 20 | 464<br>0 $\pm$ 20 | 454<br>3 $\pm$ 18 |
|                                           | .3                | .0                | .6                | .8                | .9                | .6                | .5                | .9                | .1                | .1                | .8                |
